# Supplementary material for: Thickness-controllable Li–Zn composite anode for high-energy and low-N/P ratio lithium metal batteries
Source: Royal Society of Chemistry journal article supplement (doi:10.1039/d2ta02162e), 2022-01-01
Supplement: d2ta02162e1.pdf [file d2ta02162e1.pdf]

**Supporting Information:**

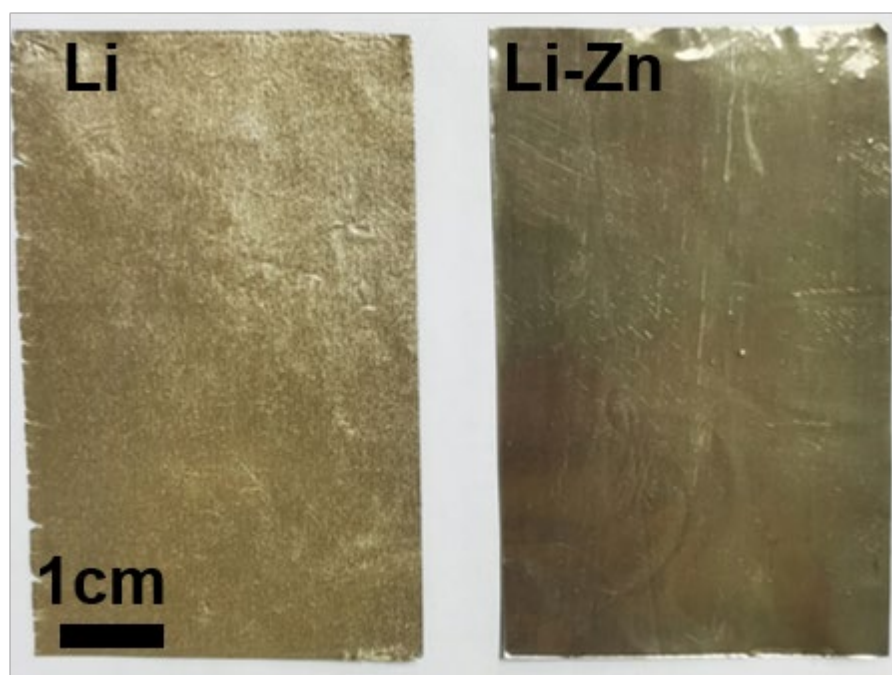

**Figure S1.** Digital images of Li and Li-Zn composite

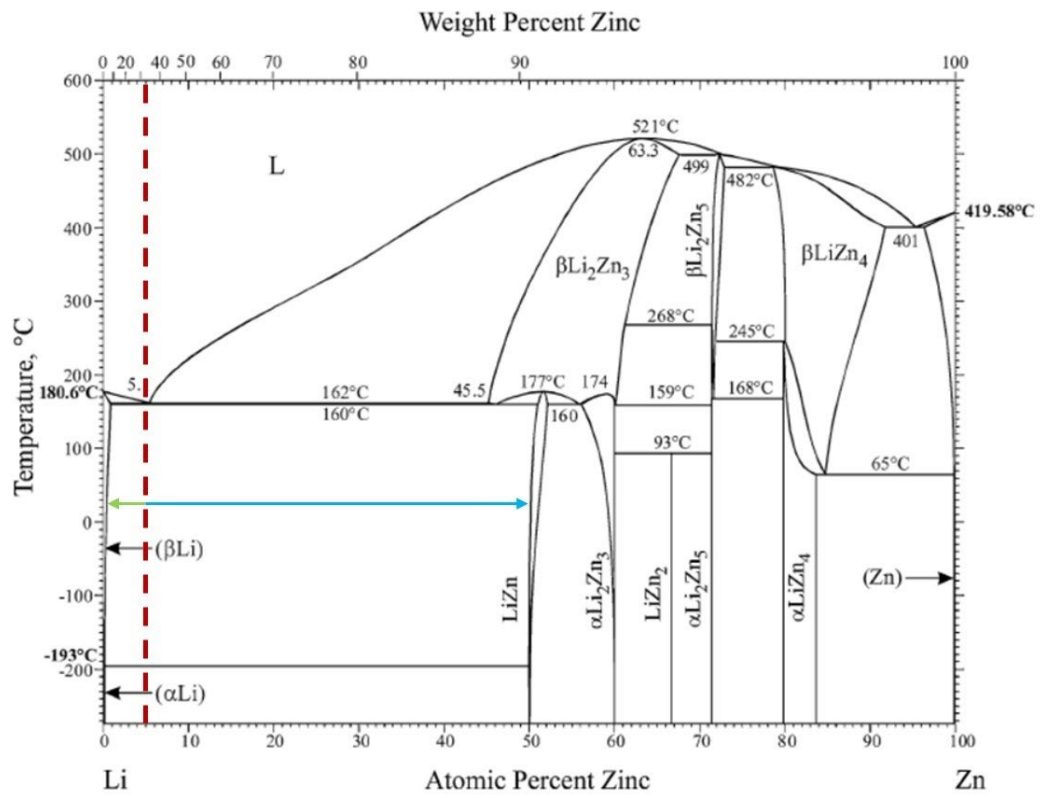

Figure S2. Phase diagram of Li-Zn composite

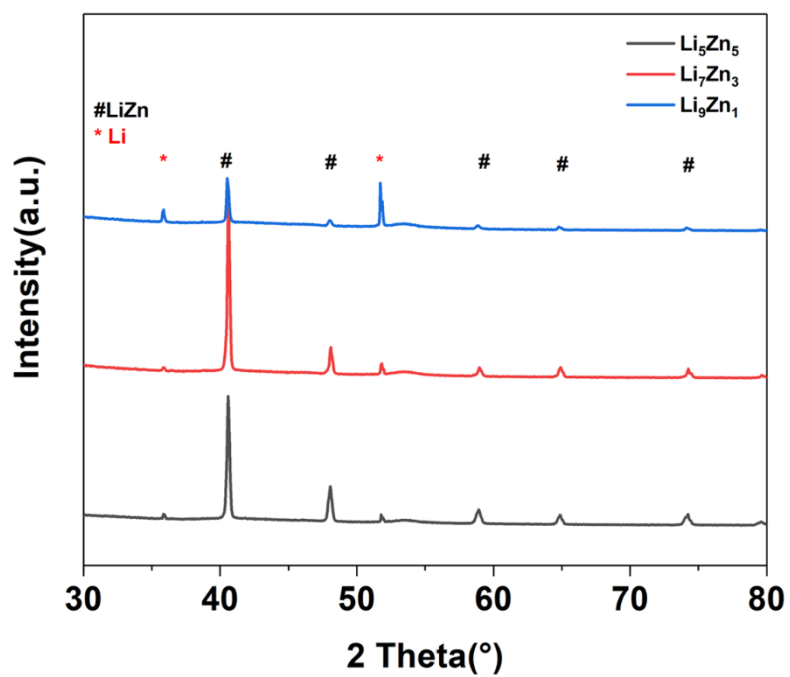

Figure S3. XRD of Li-Zn composites with different Zn dosage.

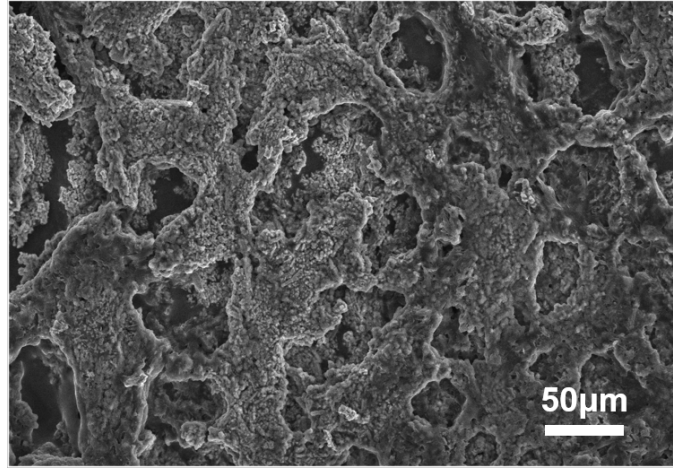

**Figure S4.** The SEM images of 3D skeleton of 50µm-thick Li-Zn foil after extracting 85% of Li inventory (8 mAh cm<sup>-2</sup>).

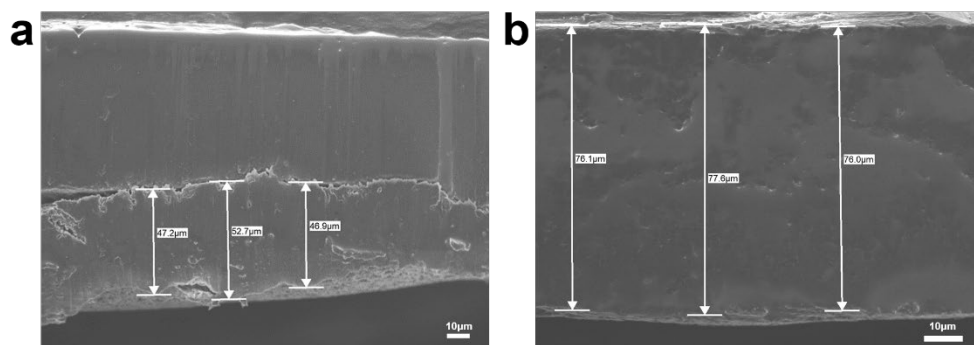

**Figure S5.** SEM images of the deposition layer of bare-Li (a) and LiZn (b) under  $4 \text{ mAh cm}^{-2}$ , respectively.

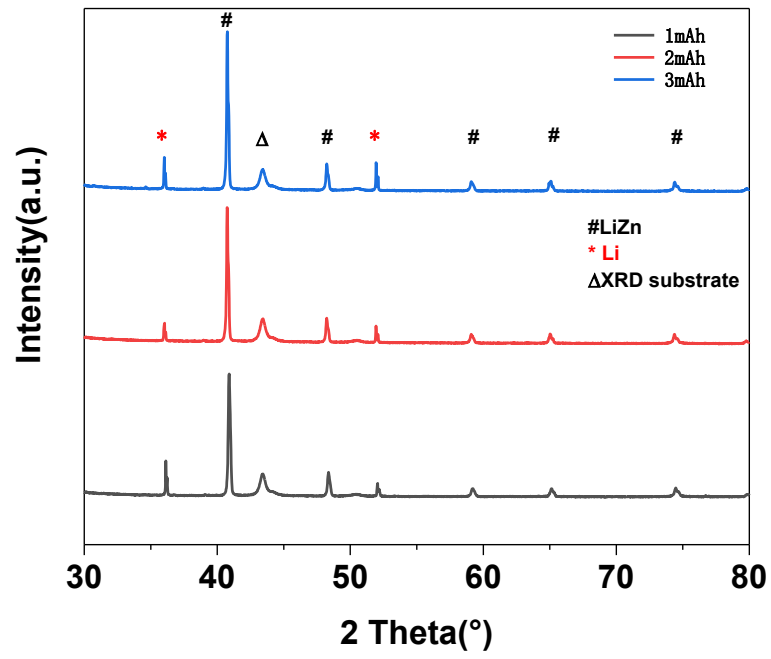

**Figure S6.** XRD of the Li-Zn anode with 1-3 mAh cm<sup>-2</sup> plating.

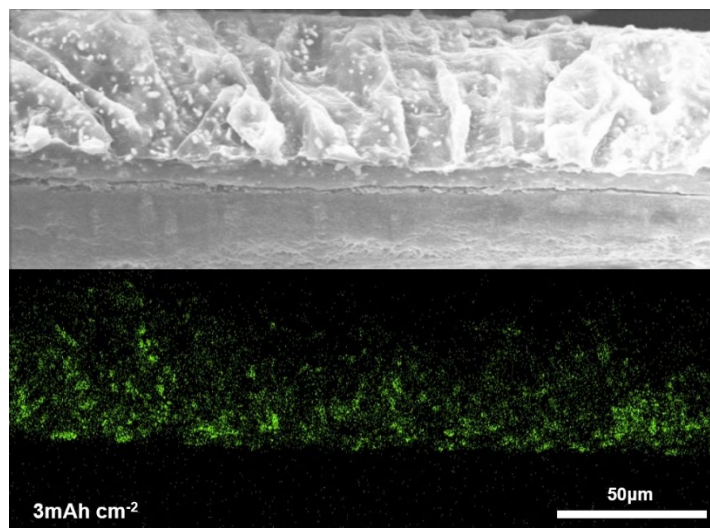

**Figure S7.** Cross-sectional SEM and EDS images of Li-Zn composite with 3 mAh cm<sup>-2</sup> plating.

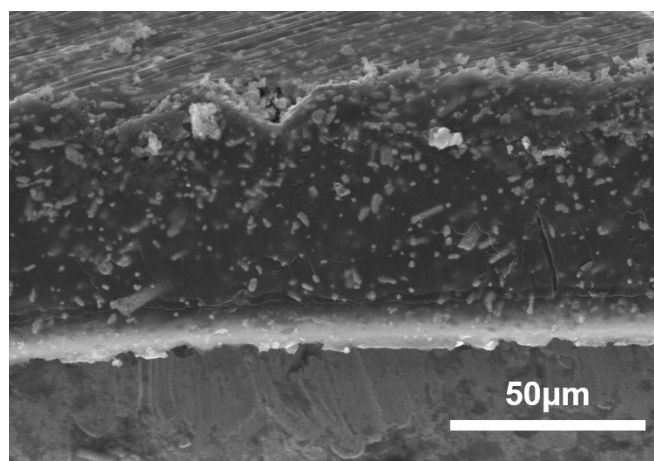

**Figure S8.** The cross-section SEM image of Li-Zn foil after 100 plating/stripping tests under the condition of  $5 \text{ mA cm}^{-2}$  and  $2 \text{ mAh cm}^{-2}$  (ended at stripping state).



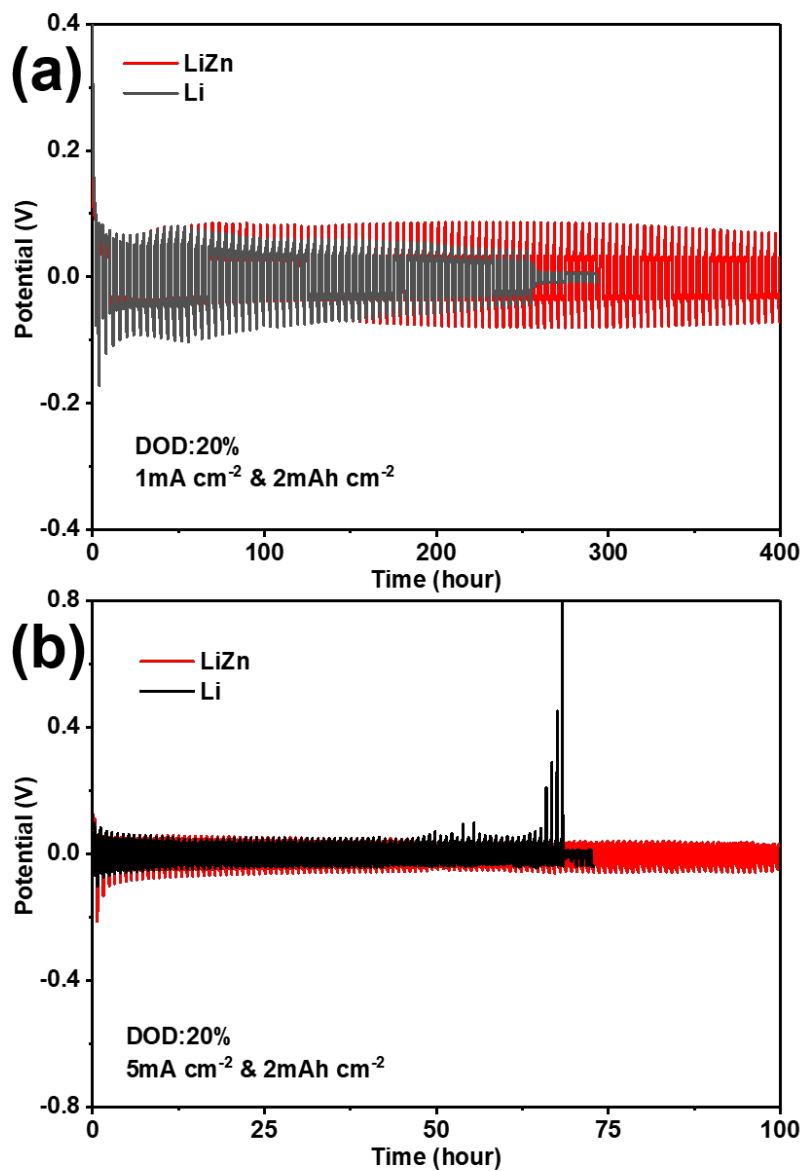

**Figure S9.** Stripping/plating test of bare-Li and Li-Zn composite symmetric cells (a) with an area capacity of 1 mA h cm<sup>-2</sup> at 2 mA cm<sup>-2</sup> with the electrolyte of 1M LiTFSI in DOL/DME (1:1 by volume) with 1 wt% LiNO<sub>3</sub>, and (b) with an area capacity of 2 mA h cm<sup>-2</sup> at 5 mA cm<sup>-2</sup> with the electrolyte of 2M LiFSI in DME. The depth of discharge (DOD) is 20%.

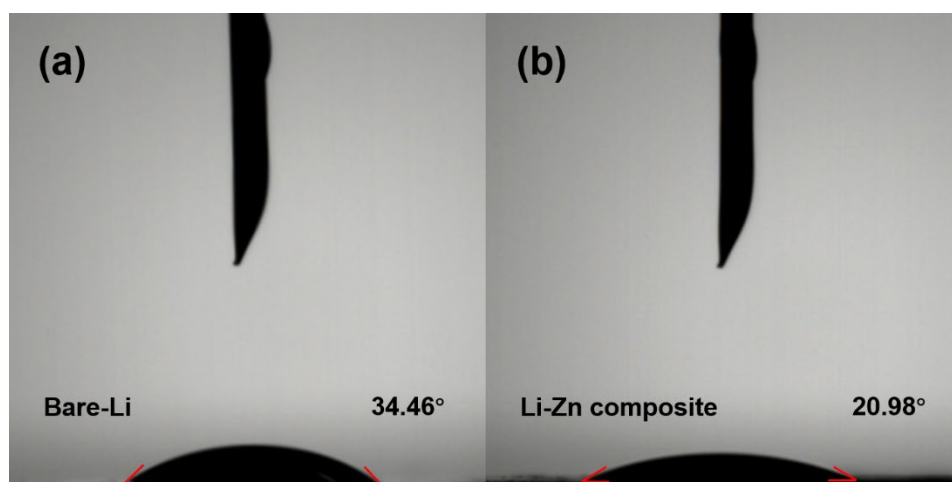

**Figure S10.** Contact angle measurements of the electrolyte (1M LiFP<sub>6</sub> in EC/DEC=v/v =1:1 with 10wt% FEC and 1wt% VC as additives) on the (a) bare-Li and (b) Li-Zn composite.

---

**Table S1.** Calculation of Zn dosage of Li-Zn composite

| Mass ratio (Zn) | Mass ratio (Li) | Ar(Zn)/ g mol <sup>-1</sup> | Ar(Li) / g mol <sup>-1</sup> | Mass ratio (Zn) / Ar (Zn) / [ Mass ratio (Zn) / Ar (Zn) + Mass ratio (Li) / Ar (Li)] |
|-----------------|-----------------|-----------------------------|------------------------------|--------------------------------------------------------------------------------------|
| 0.3             | 0.7             | 65.38                       | 6.94                         | 4.35%                                                                                |

---

**Table S2.** Calculation of volumetric capacity of Li-Zn composite

| Discharge quantity/mAh | Diameter/mm | Thickness/ $\mu\text{m}$ | Volumetric capacity/mAh $\text{cm}^{-3}$ | Gravimetric capacity/mAh $\text{g}^{-1}$ |
|------------------------|-------------|--------------------------|------------------------------------------|------------------------------------------|
| 12.541                 | 12          | 59                       | 1880.4                                   | 2544.0                                   |

**Table S3.** Coin cells with different N/P ratio

| Recipe                               | N/P ratio | Reference | Positive capacity /mAh cm <sup>-2</sup> | Cathode | Electrolyte/ $\mu$ L | Cycle life | Current/C-rate |
|--------------------------------------|-----------|-----------|-----------------------------------------|---------|----------------------|------------|----------------|
| Li-LPS                               | 253.7     | Ref.32    | 0.39                                    | LCO     | /                    | 200        | 1              |
| Li-LiF                               | 189.8     | Ref.35    | 0.25                                    | LFP     | 60                   | 100        | 2              |
| Li-Ca                                | 128.8     | Ref.29    | 0.32                                    | LCO     | /                    | 500        | 1              |
| Li <sub>10</sub> Zn                  | 111.4     | Ref.28    | 0.70                                    | LTO     | /                    | 4000       | 1              |
| Li <sub>13</sub> In <sub>3</sub>  Li | 85.8      | Ref.37    | 0.38                                    | LTO     | 40                   | 1500       | 5              |
| Armored Li                           | 71.4      | Ref.36    | 1.44                                    | NCM     | 80                   | 150        | 0.5            |
| Patterned Li                         | 69.8      | Ref.38    | 1.33                                    | LMO     | 250                  | 450        | 0.5            |
| GaLi-Li                              | 42.8      | Ref.13    | 1.68                                    | LFP     | 100                  | 200        | 0.5            |
| Li-0.3Zn                             | 40.8      | Ref.27    | 0.26                                    | LFP     | /                    | 200        | 1              |
| Mg-Li                                | 38.7      | Ref.26    | 0.80                                    | LFP     | 30                   | 100        | 3              |
| LLN@Li                               | 10.3      | Ref.34    | 1.00                                    | LFP     | 50                   | 150        | 1              |
| Li-Al                                | 10.0      | Ref.23    | 4.10                                    | NCM     | 30                   | 180        | 1              |
| Li@PI-ZnO@Cu <sub>3</sub> N-SBR      | 3.3       | Ref.33    | 3.00                                    | LTO     | 50                   | 100        | 0.5            |
| Li-Zn                                | 3.3       | Our work  | 3.00                                    | LFP     | 40                   | 130        | 0.5            |
| Li@SCS                               | 1.2       | Ref.11    | 2.70                                    | LFP     | 80                   | 45         | 0.5            |

---

**Table S4.** Calculation of the energy density of jelly roll

| Discharge Energy/Wh | Electrode & Separator/g | Electrolyte/g | Thickness of Electrode & Separator / $\mu\text{m}$ | Volume/ $\text{cm}^3$ | Volumetric Energy Density/Wh $\text{L}^{-1}$ | Mass Energy Density /Wh $\text{kg}^{-1}$ |
|---------------------|-------------------------|---------------|----------------------------------------------------|-----------------------|----------------------------------------------|------------------------------------------|
| 2.782               | 5.1                     | 2.7           | 910                                                | 2.275                 | 1222.9                                       | 356.7                                    |
